# Supplementary material
Source: publisher figshare collection journal article supplement (https://gsajournals.figshare.com/ndownloader/files/13687640)
Supplement: Supplementary file 1 [file 13687640]

**Table S11:** Iso-nuclear F1 pairs from the 14×14 matrix with major effect mitochondrial genotype-dependent phenotype(s).

| **Iso-nuclear F1** | **ATP6** | **Mitochondrial genotype-dependent phenotype(s)** |
| --- | --- | --- |
| YJM145/YJM1479 | S vs. S | SE+Myx |
| YJM145/YJM1552 | S vs. R | YPE+Oli |
| YJM271/YJM1248 | S vs. R | SE+Myx (T) |
| YJM271/YJM1479 | S vs. S | YPD+Cyh |
| YJM320/YJM1244 | S vs. S | YPE+Myx (T) |
| YJM320/YJM1479 | S vs. S | SE+Myx |
| YJM320/YJM1552 | S vs. R | YPE+Oli, SE+Myx (T) |
| YJM627/YJM145 | S vs. S | YPE+Oli |
| YJM627/YJM984 | S vs. R | SE+Myx |
| YJM627/YJM1244 | S vs. S | SE+Myx (T) |
| YJM627/YJM1248 | S vs. R | YPE+Oli |
| YJM627/YJM1341 | S vs. S | SE+Myx (T) |
| YJM627/YJM1355 | S vs. S | SE+Myx (T) |
| YJM627/YJM1386 | S vs. R | YPE+Oli |
| YJM627/YJM1450 | S vs. R | YPE+Oli |
| YJM627/YJM1552 | S vs. R | YPE+Oli |
| YJM984/YJM320 | R vs. S | YPE+Myx (T) |
| YJM1244/YJM1248 | S vs. R | YPE+Oli |
| YJM1252/YJM1450 | S vs. R | YPE+Oli |
| YJM1252/YJM1552 | S vs. R | YPE+Oli |
| YJM1341/YJM1248 | S vs. R | YPE+Oli |
| YJM1341/YJM1450 | S vs. R | YPE+Oli |
| YJM1341/YJM1552 | S vs. R | YPE+Oli |
| YJM1355/YJM1248 | S vs. R | SE+Myx |
| YJM1355/YJM1552 | S vs. R | YPE+Oli, YPD+Ket |
| YJM1386/YJM1552 | R vs. R | YPE+Oli, YPD+Ket |
| YJM1450/YJM1479 | R vs. S | YPD+Cyh (T) |
| YJM1479/YJM1552 | S vs. R | YPE+Oli, SE+Myx |
